# Supplementary material for: Early‐life regional and temporal variation in filaggrin‐derived natural moisturizing factor, filaggrin‐processing enzyme activity, corneocyte phenotypes and plasmin activity: implications for atopic dermatitis
Source: PubMed Central journal article supplement (PMC6175251; doi:10.1111/bjd.16691), 2018-06-29

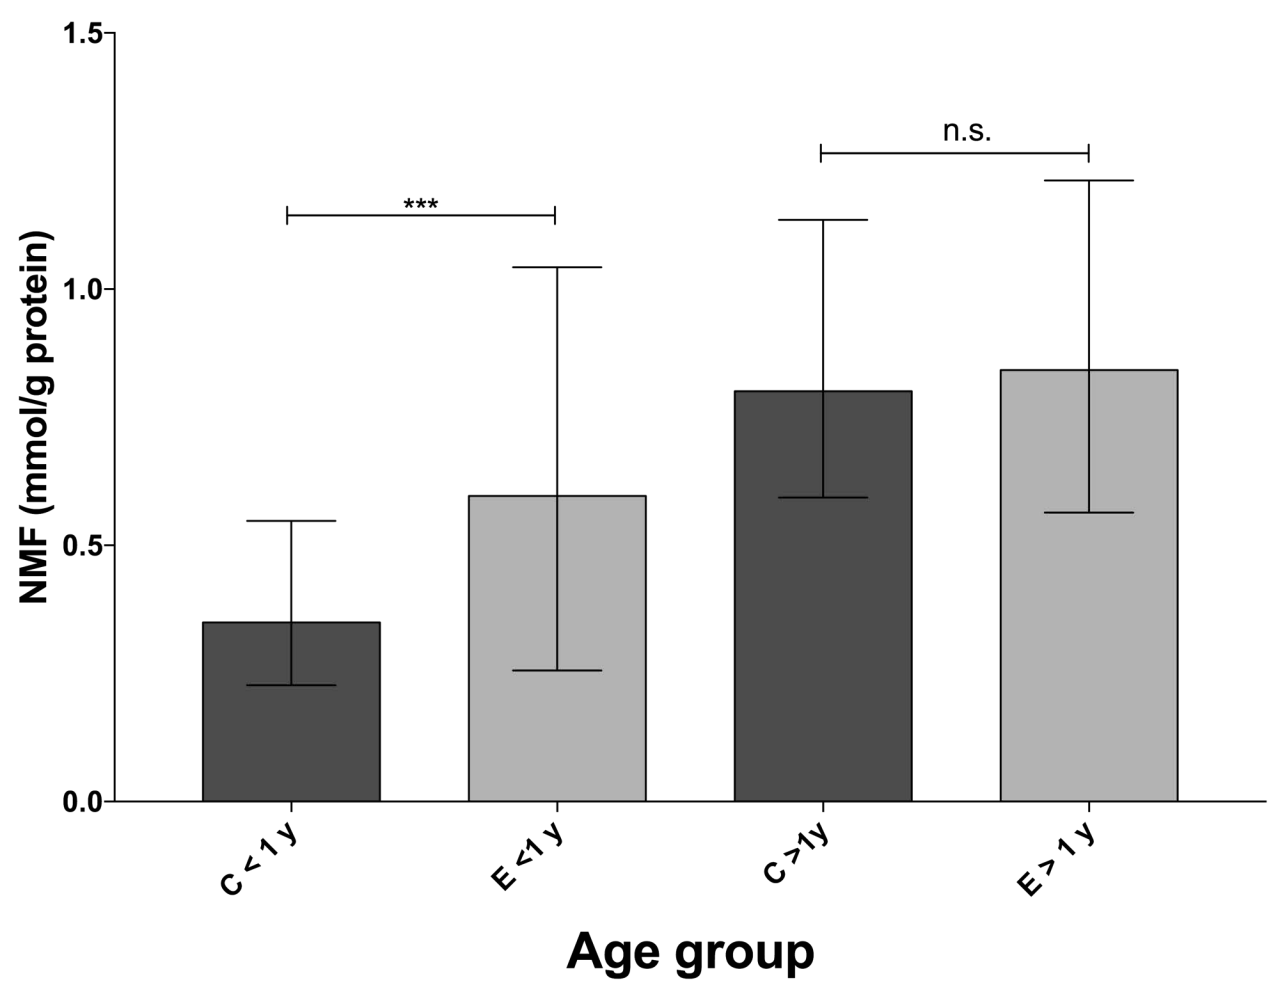

Supplement: BJD-179-431-s004.pdf [file BJD-179-431-s004.pdf]
